# Supplementary material for: Physiological, genomic and transcriptional diversity in responses to boron deficiency in rapeseed genotypes
Source: PubMed Central journal article supplement (PMC5066495; doi:10.1093/jxb/erw342), 2016-09-17
Supplement: supp_erw342_Supplementary_Figures_S1_S6_Tables_S1_S4.pdf [file supp_erw342_Supplementary_Figures_S1_S6_Tables_S1_S4.pdf]

**Supplementary data**

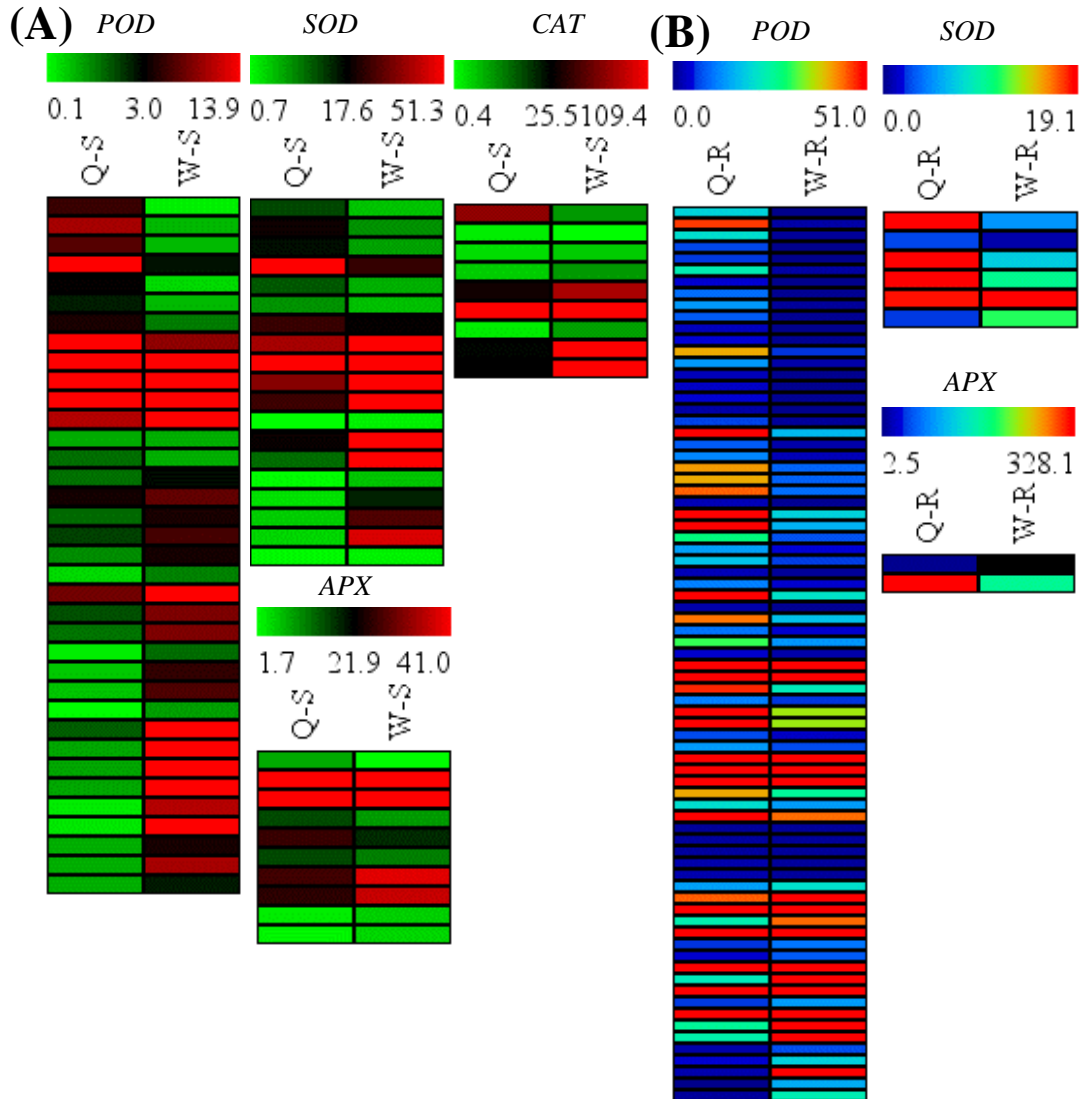

**Supplementary Fig. S1** Expression profiles of differentially expressed genes (DEGs) related to antioxidant enzymes in the shoots (A) and roots (B) of the B-efficient genotype ‘QY10’ and the B-inefficient genotype ‘W10’, which were exposed to 10-day B deficiency (0.25  $\mu$ M) condition. ‘Q-S’ and ‘W-S’ represent the DEGs in the shoots of ‘QY10’ and ‘W10’, and ‘Q-R’ and ‘W-R’ represent the DEGs in the roots of ‘QY10’ and ‘W10’. POD: peroxidase; SOD: superoxide dismutase; APX: ascorbate oxidase; CAT: catalase.

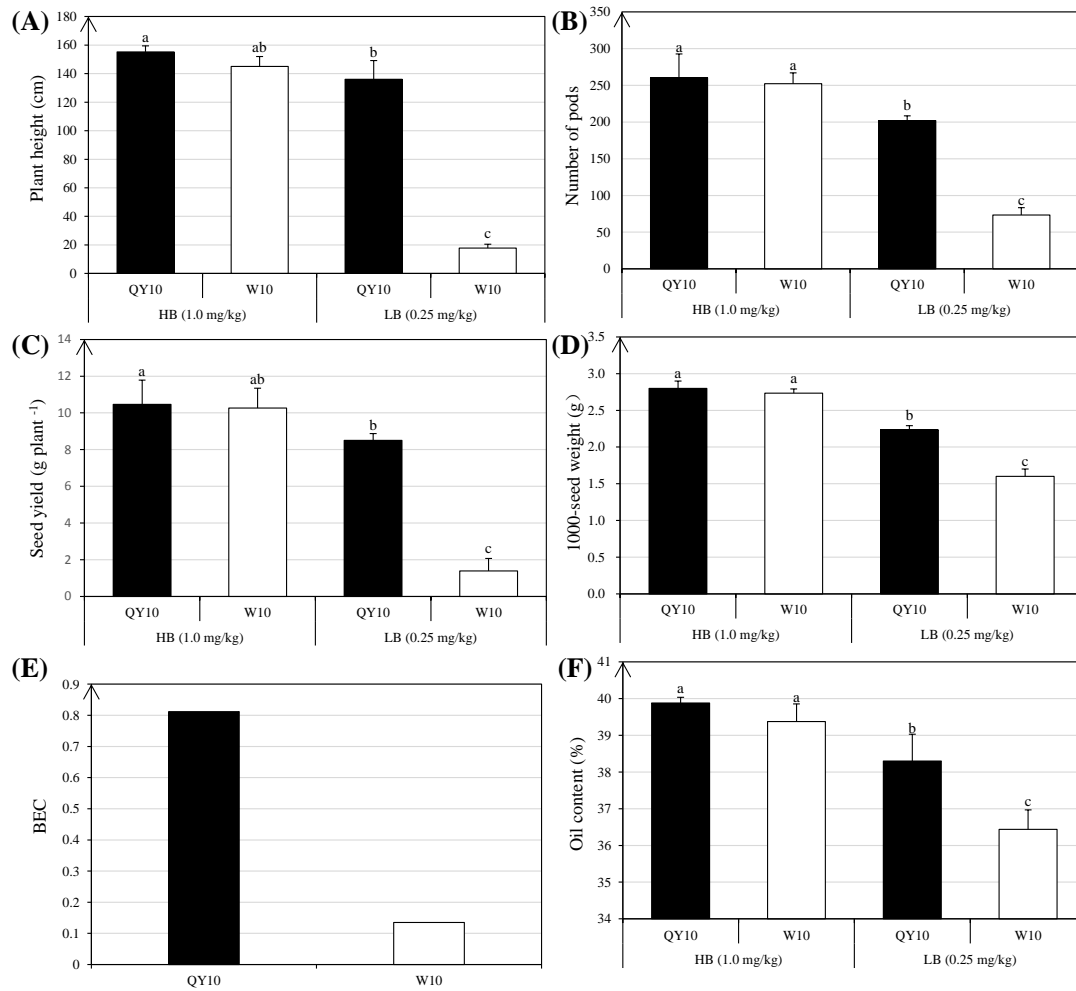

**Supplementary Fig. S2** Reproductive performance of the B-efficient genotype ‘QY10’ and the B-inefficient genotype ‘W10’ grown under pot culture systems. (A) Plant height (cm); (B) number of pods; (C) seed yield; (D) 1000-seed weight; (E) BEC of ‘QY10’ and ‘W10’, B efficiency coefficient (BEC) = seed yield (0.25 mg B per kg soil) / seed yield (1.0 mg B per kg soil) (Hua *et al.*, 2016); (F) oil content. HB: high B, 1.0 mg B per kg soil; LB: low B, 0.25 mg B per kg soil. Bars denote the means (n = 3), and error bars denote the standard deviations (SD). The significance level was set at a *P*-value < 0.05.

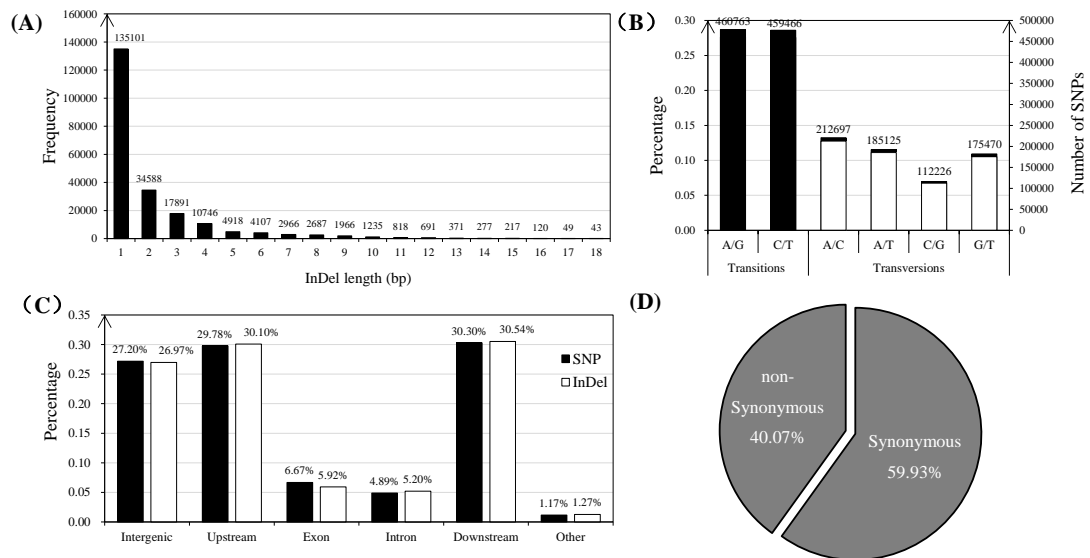

**Supplementary Fig. S3** Annotations of insertions/deletions (InDels) and single nucleotide polymorphisms (SNPs) identified through the whole-genome re-sequencing (WGS) of the B-efficient genotype ‘QY10’ and the B-inefficient genotype ‘W10’. (A) Frequencies and size (bp) of InDels; (B) frequencies of substitution types of SNPs. (C) Distribution of SNPs and InDels in different genomic regions. (D) The number of synonymous and non-synonymous SNPs detected within the coding sequencing (CDS) regions.

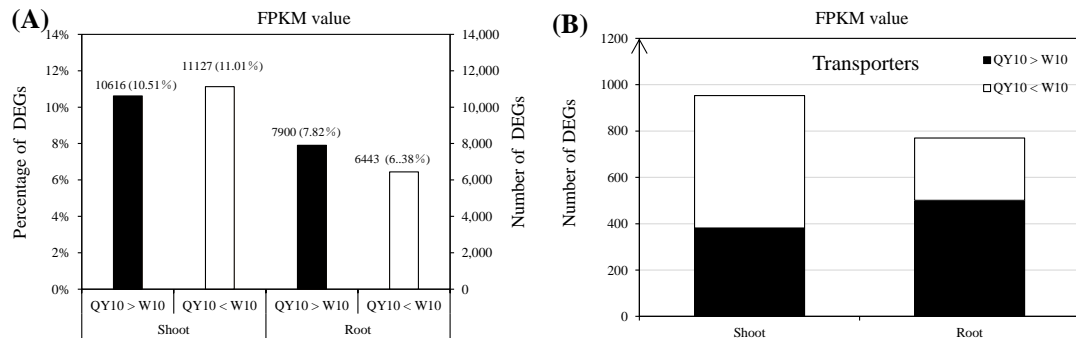

**Supplementary Fig. S4** Numbers of differentially expressed genes (DEGs) in the shoots and roots of the B-efficient genotype ‘QY10’ and the B-inefficient genotype ‘W10’. (A) Number of total DEGs in the shoots and roots; (B) number of DEGs for transporters. “QY10 > W10” indicates that the transcript levels of the DEGs are higher in ‘QY10’ than in ‘W10’, and vice versa.

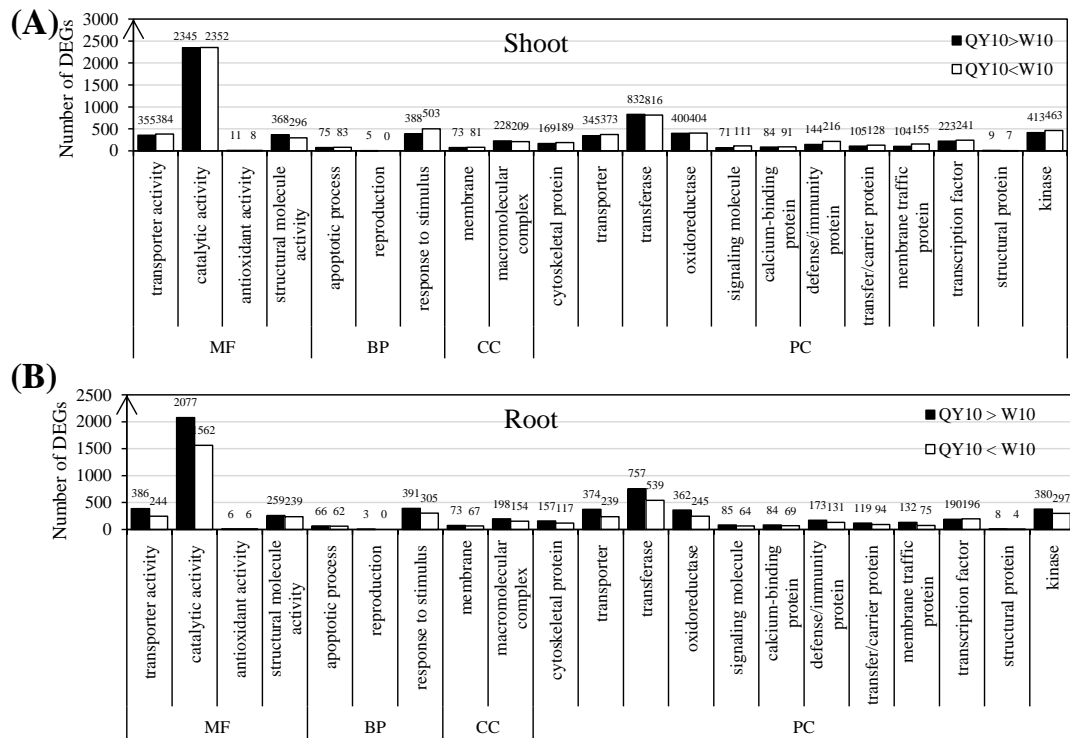

**Supplementary Fig. S5** Gene ontology (GO) enrichment analysis of DEGs in the shoots (A) and roots (B) between the B-efficient genotype ‘QY10’ and the B-inefficient genotype ‘W10’. MF: molecular function; BP: biological process; CC: cellular component; PC: protein class. “QY10 > W10” indicates that the transcript levels of the DEGs are higher in ‘QY10’ than in ‘W10’, and vice versa.

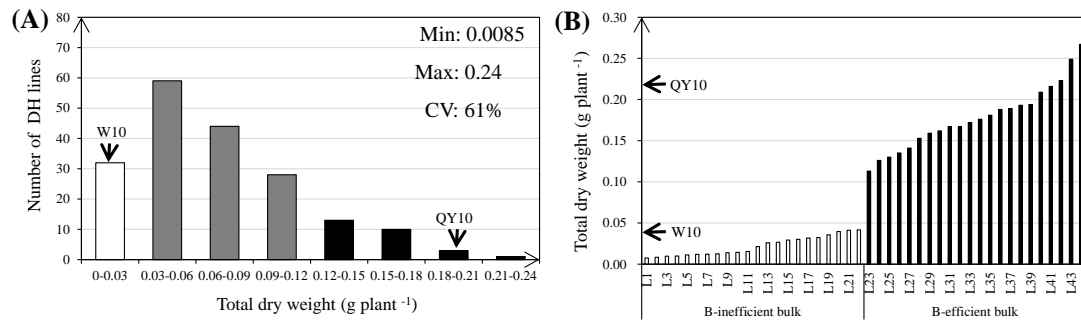

**Supplementary Fig. S6** Frequency distribution of total dry weight in the 190-line DH population derived from the B-efficient genotype ‘QY10’ and the B-inefficient genotype ‘W10’. (A) Frequency distribution of total dry weight in the 190-line DH population, which were cultivated under hydroponic culture systems. The B-efficient and -inefficient pools (~30 lines for each pool) roughly selected from the 190-line DH population are denoted by black and white columns. (B) Validation of B efficiency of the B-efficient and -inefficient line pools through hydroponic culture. Total dry weights of ‘QY10’ and ‘W10’ are denoted by arrows.

**Table S1** Primer sequences used for RT-qPCR assays in this research

| Gene                | Primer sequence (5'-3')      |                         |
|---------------------|------------------------------|-------------------------|
|                     | Forward                      | Reverse                 |
| <i>Bnac2.NIP5;1</i> | CCTAATTGGTAACGCGGCATGT       | TCAGCGAAGGGTTTAAGTGAGCT |
| <i>BnaC2.ABCG21</i> | GACTTACAGTTGTAGTAACGATGTGTCA | GAATGCCACCATAAGAGGCCAG  |
| Actin               | ACAGTGTCTGGATCGGTGGTTC       | TGCCTCATCATACTCAGCCTTG  |

**Table S2** Overview of reads generated from Illumina Hiseq 2500 for digital gene expression (DGE) profiling

| Sample name |      | Raw Reads  | Clean reads | Clean bases | Error (%) | Q20 (%) | Q30 (%) | GC (%) |       |
|-------------|------|------------|-------------|-------------|-----------|---------|---------|--------|-------|
| Shoot       | R1   | 14,124,353 | 13,228,316  | 0.66 G      | 0.01      | 98.61   | 95.74   | 47.32  |       |
|             | QY10 | R2         | 13,965,834  | 13,136,733  | 0.66 G    | 0.01    | 98.63   | 95.82  | 46.51 |
|             | R3   | 13,496,185 | 12,831,669  | 0.64 G      | 0.01      | 98.65   | 95.84   | 46.64  |       |
|             | R1   | 13,637,492 | 12,998,934  | 0.65 G      | 0.01      | 98.65   | 95.8    | 47.54  |       |
|             | W10  | R2         | 14,233,990  | 13,461,872  | 0.67 G    | 0.01    | 98.65   | 95.83  | 46.31 |
|             | R3   | 13,156,784 | 13,049,106  | 0.65 G      | 0.01      | 98.71   | 95.86   | 47.39  |       |
| Root        | R1   | 15,085,715 | 15,051,356  | 0.75 G      | 0.01      | 98.57   | 95.74   | 45.41  |       |
|             | QY10 | R2         | 13,181,542  | 13,141,067  | 0.66 G    | 0.01    | 98.63   | 95.76  | 46.32 |
|             | R3   | 13,380,622 | 13,337,441  | 0.67 G      | 0.01      | 98.64   | 95.78   | 46.35  |       |
|             | R1   | 13,243,078 | 12,391,022  | 0.62 G      | 0.01      | 98.61   | 95.72   | 46.27  |       |
|             | W10  | R2         | 13,524,445  | 12,613,107  | 0.63 G    | 0.01    | 98.61   | 95.73  | 46.46 |
|             | R3   | 10,228,329 | 9,928,055   | 0.50 G      | 0.01      | 98.03   | 94.95   | 47.02  |       |



**Table S3** Annotated genes in the QTL *qBEC-C2a* region on chromosome C2

| Gene ID       | Number of exons | CDS/aa size (bp/-) | <i>A. thaliana</i> homologs | E value  | Putative protein function                      |
|---------------|-----------------|--------------------|-----------------------------|----------|------------------------------------------------|
| BnaC02g26130D | 7               | 1650/549           | AT4G04540                   | 0        | Cysteine-rich kinase 39 (CRK39)                |
| BnaC02g26380D | 4               | 390/129            | AT4G04780                   | 2.0E-67  | Mediator complex                               |
| BnaC02g27870D | 2               | 204/67             | AT1G48520                   | 4.0E-10  | Glutaminyl-tRNA synthase                       |
| BnaC02g28010D | 3               | 354/117            | -                           | -        | Unknown                                        |
| BnaC02g28790D | 1               | 495/164            | AT5G42820                   | 6.0E-43  | RNA binding                                    |
| BnaC02g28840D | 2               | 348/115            | -                           | -        | Unknown                                        |
| BnaC02g28900D | 2               | 744/247            | -                           | -        | Unknown                                        |
| BnaC02g29210D | 4               | 906/301            | AT4G10380                   | 1.0E-170 | Nodulin 26-like intrinsic protein 5;1 (NIP5;1) |
| BnaC02g29860D | 1               | 411/1136           | AT5G42200                   | 2.0E-78  | RING/U-box superfamily protein                 |

**Table S4** Annotated genes in the QTL *qBEC-C2b* region on chromosome C2

| Gene ID       | Number of exons | CDS/aa size (bp/-) | <i>A. thaliana</i> homologs | E value  | Putative protein function                  |
|---------------|-----------------|--------------------|-----------------------------|----------|--------------------------------------------|
| BnaC02g32320D | 2               | 276/91             | AT2G34690                   | 2.0E-14  | ACCELERATED CELL DEATH 11 (ACD11)          |
| BnaC02g32330D | 3               | 381/126            | AT2G34690                   | 3.0E-46  | ACCELERATED CELL DEATH 11 (ACD11)          |
| BnaC02g33830D | 6               | 1077/358           | AT2G01260                   | 4.0E-174 | Unknown                                    |
| BnaC02g33980D | 3               | 543/180            | AT2G01540                   | 3.0E-119 | Calcium-dependent lipid-binding protein    |
| BnaC02g34120D | 7               | 999/332            | AT2G01880                   | 0        | Purple acid phosphatase 7 (PAP7)           |
| BnaC02g34140D | 8               | 1290/429           | AT2G01900                   | 0        | Endonuclease/exonuclease/phosphatase       |
| BnaC02g34260D | 6               | 1482/493           | AT2G02010                   | 0        | Glutamate decarboxylase 4 (GAD4)           |
| BnaC02g34270D | 3               | 258/85             | AT5G16250                   | 7.0E-34  | Unknown                                    |
| BnaC02g34720D | 3               | 438/145            | AT3G62050                   | 7.0E-20  | Glycosyl hydrolase                         |
| BnaC02g35410D | 6               | 915/304            | AT1G13580                   | 2.0E-177 | LAG1 longevity assurance homolog 3 (LAG13) |
| BnaC02g35560D | 5               | 2058/685           | AT3G25620                   | 0        | ATP-binding cassette (ABC) transporter     |
| BnaC02g35830D | 4               | 453/150            | AT3G25930                   | 2.0E-79  | Alpha hydrolases-like protein              |
| BnaC02g35980D | 2               | 1311/436           | AT3G26210                   | 0        | Cytochrome P450                            |
